# Supplementary material
Source: Springer Nature journal article supplement (https://www.springermedizin.de/resource/supplementary/12872_2007_191_MOESM4_ESM.pdf/9431208)

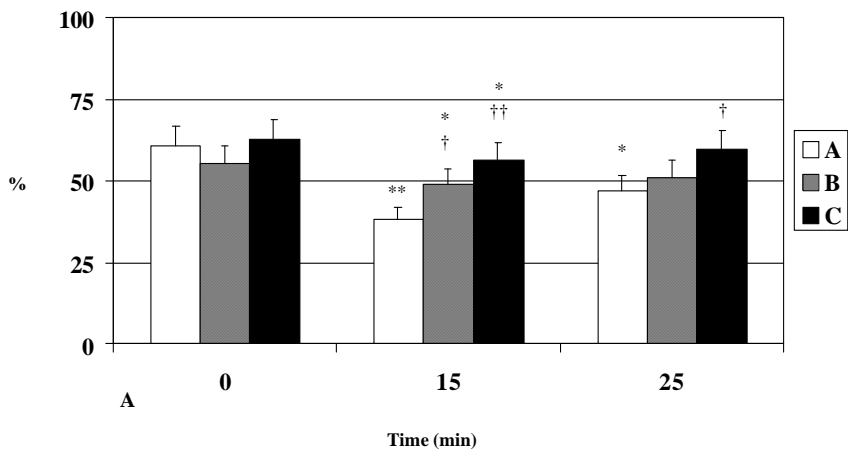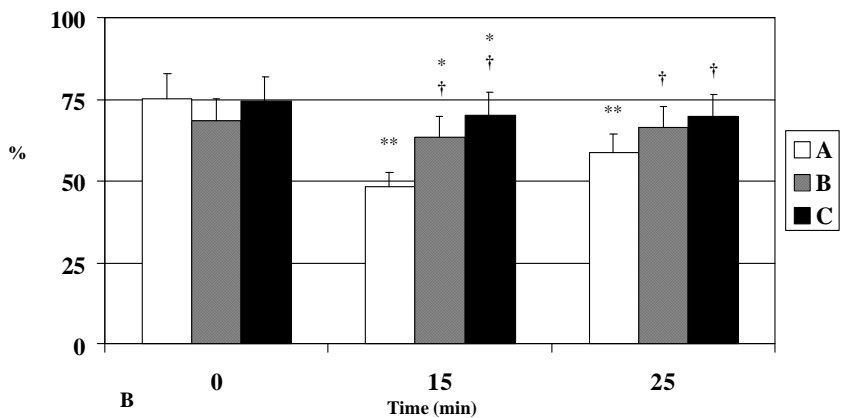

Supplement: MOESM4 [file 9431208]
